# Supplementary material for: Trained innate immunity modulates osteoblast and osteoclast differentiation
Source: PubMed Central journal article supplement (PMC11087362; doi:10.1007/s12015-024-10711-9), 2024-03-13
Supplement: 12015_2024_10711_MOESM1_ESM.pdf [file 12015_2024_10711_MOESM1_ESM.pdf]

## Supplementary data

### Trained innate immunity modulates osteoblast and osteoclast differentiation

N.R. Rahmani<sup>a\*</sup>, R. Belluomo<sup>a</sup>, M.C. Kruyt<sup>a,b</sup>, D. Gawlitta<sup>c</sup>, L.A.B. Joosten<sup>d,e</sup>, H. Weinans<sup>a,f</sup>, M. Croes<sup>a</sup>

<sup>a</sup> Department of Orthopedics, University Medical Center Utrecht, Utrecht, the Netherlands

<sup>b</sup> Department of Developmental Biomedical Engineering, Twente University, the Netherlands

<sup>c</sup> Department of Oral and Maxillofacial Surgery, Prosthodontics and Special Dental Care, University Medical Center Utrecht, Utrecht, the Netherlands

<sup>d</sup> Department of Internal Medicine, Radboudumc, Nijmegen, The Netherlands

<sup>e</sup> Department of Medical Genetics, Iuliu Hatieganu University of Medicine and Pharmacy, Cluj-Napoca, Romania

<sup>f</sup> Department of Developmental Biomechanical Engineering, TU Delft, the Netherlands

#### Supplementary Figure 1

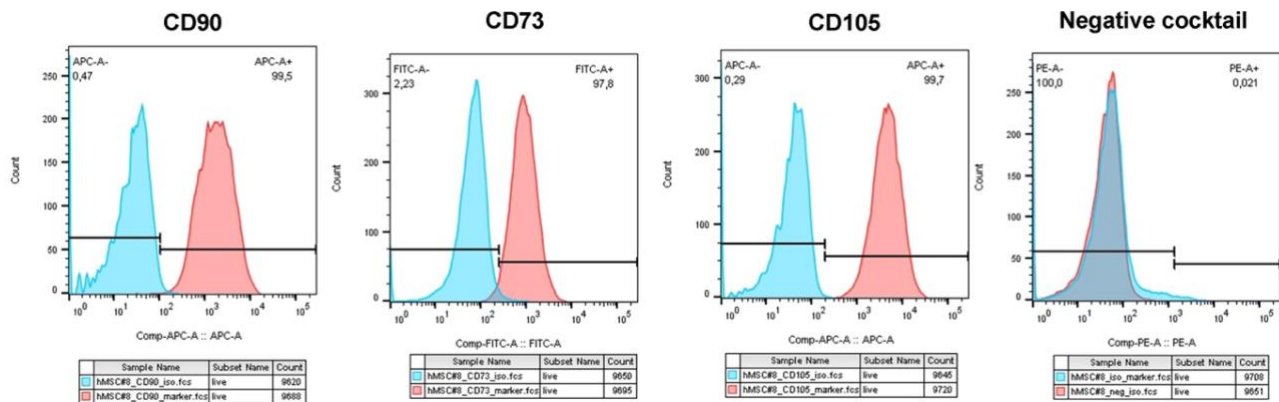

**MSC CD marker expression.** MSCs were stained with specific antibodies (red histograms) or with the isotype controls (blue histograms). The negative cocktail consists of antibodies specific for CD45, CD34, CD11b, CD79a and HLA-DR. The histograms show the result for one, representative, MSC donor.

## Supplementary Figure 2

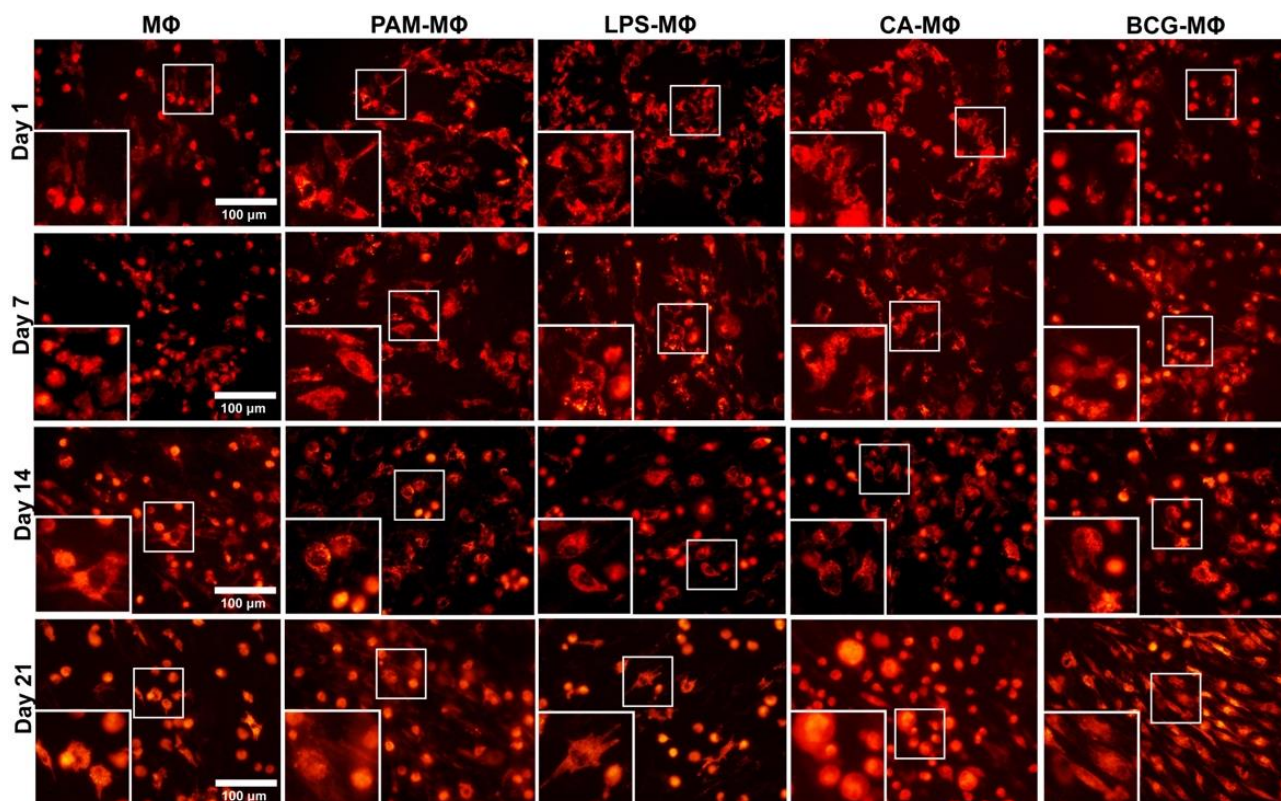

**Macrophage tracking in co-culture.** Differently primed macrophages were labeled with DiO and brought into coculture with MSCs. Images show DiO-prelabeled macrophages at different times of the coculture.

## Supplementary Figure 3

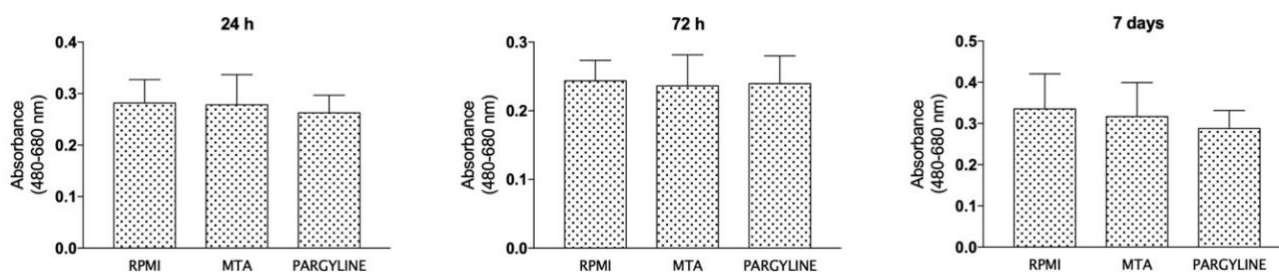

**Effect of inhibitors on cell viability.** Monocytes were stimulated for 24 hours with either culture medium, MTA (1 mM) or pargyline (3  $\mu$ M). After washing, cells were differentiated with M-CSF. At the indicated time points, supernatants were collected and subjected to the LDH cytotoxicity assay. Data are presented as mean  $\pm$  SEM (n = 5).
